# Supplementary material for: A year of genomic surveillance reveals how the SARS-CoV-2 pandemic unfolded in Africa
Source: bioRxiv or medRxiv preprint supplement (doi:10.1101/2021.05.12.21257080), 2021-05-13

# Figure S1

## A

### Introduction Events into Southern Africa

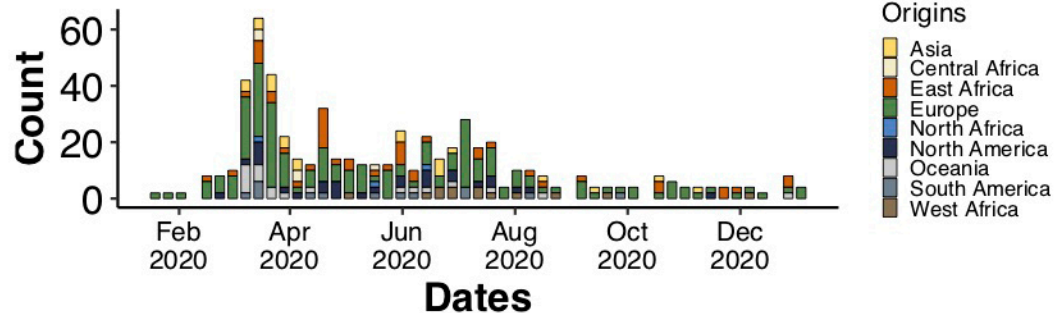

### Export Events from Southern Africa

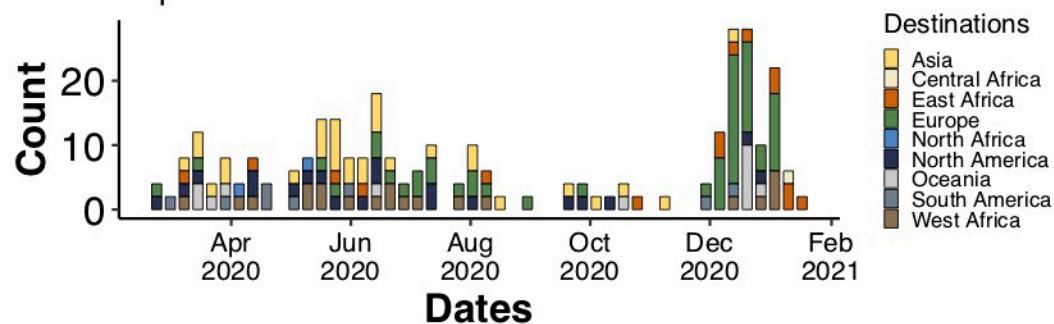

## B

### Introduction Events into East Africa

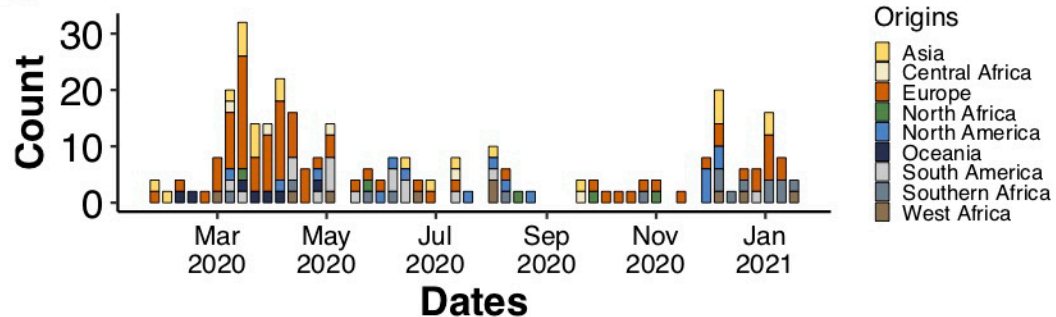

### Export Events from East Africa

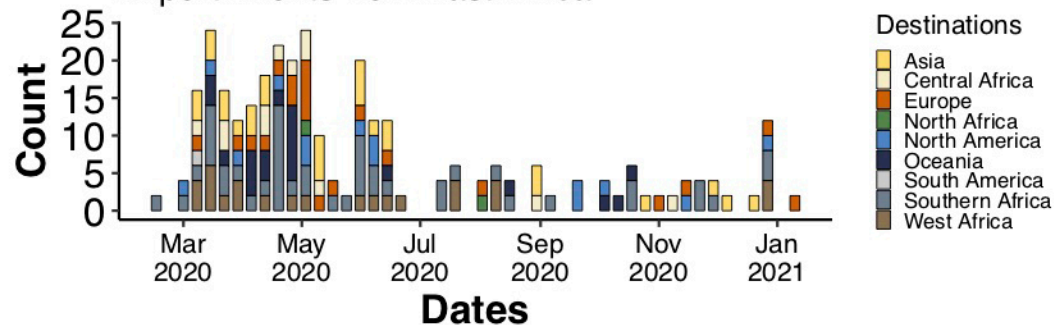

## C

### Introduction Events into Central Africa

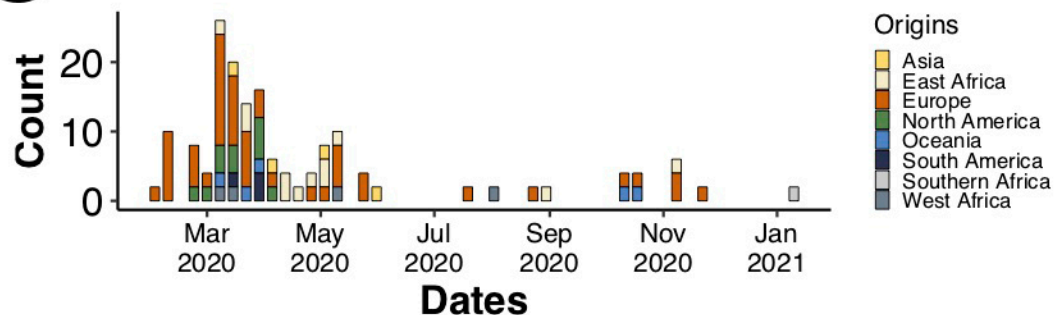

### Export Events from Central Africa

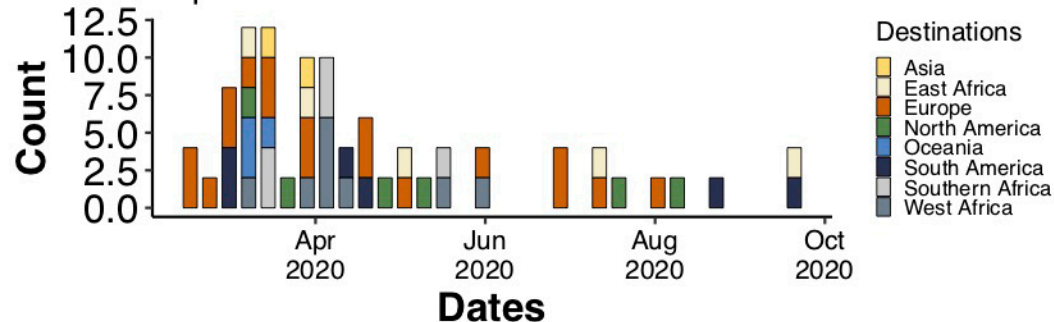

## D

### Introduction Events into West Africa

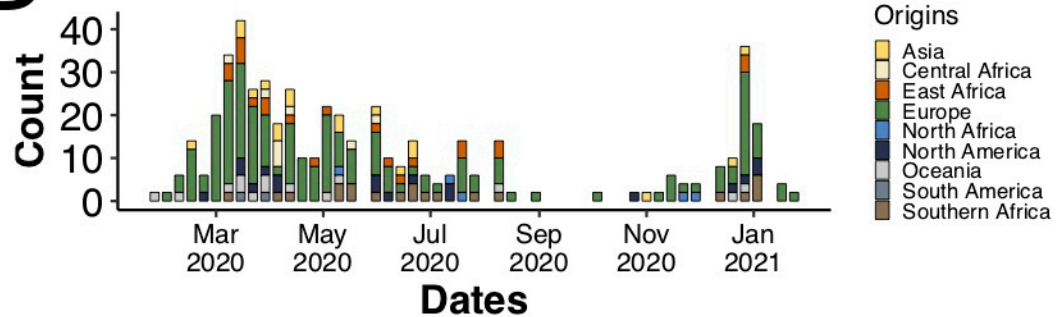

### Export Events from West Africa

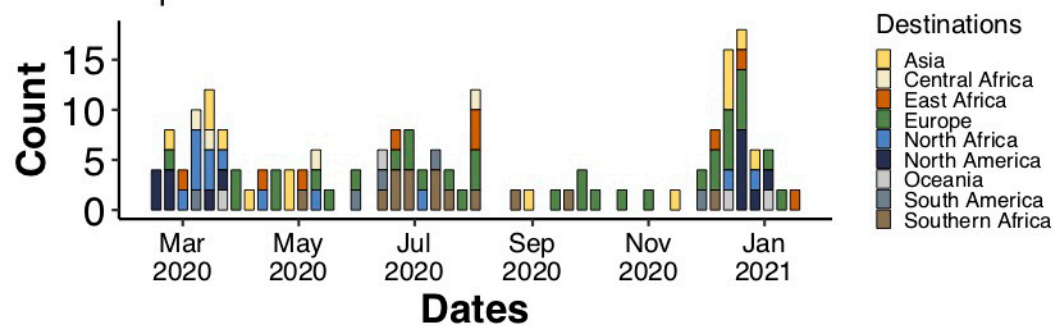

## E

### Introduction Events into North Africa

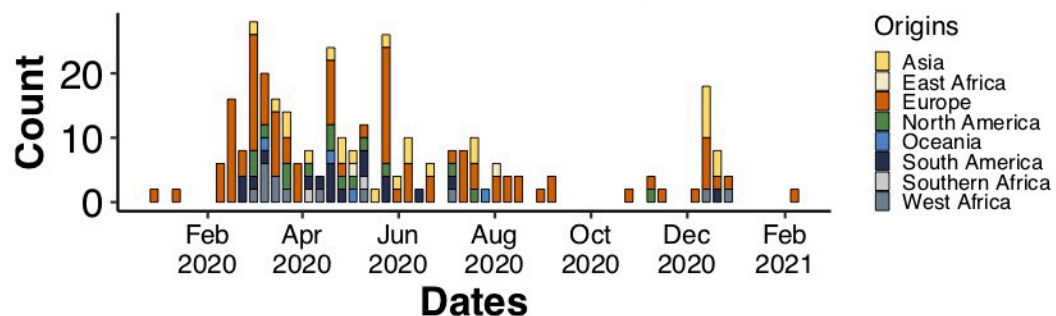

### Export Events from North Africa

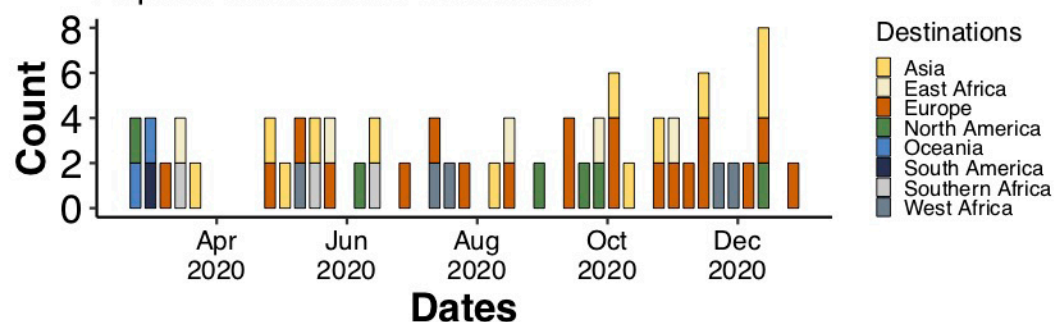

Supplement: Supplementary file [file media-1.pdf]
