# Supplementary material for: A year of genomic surveillance reveals how the SARS-CoV-2 pandemic unfolded in Africa
Source: bioRxiv or medRxiv preprint supplement (doi:10.1101/2021.05.12.21257080), 2021-05-13

Figure S4

**A**

B.1.351

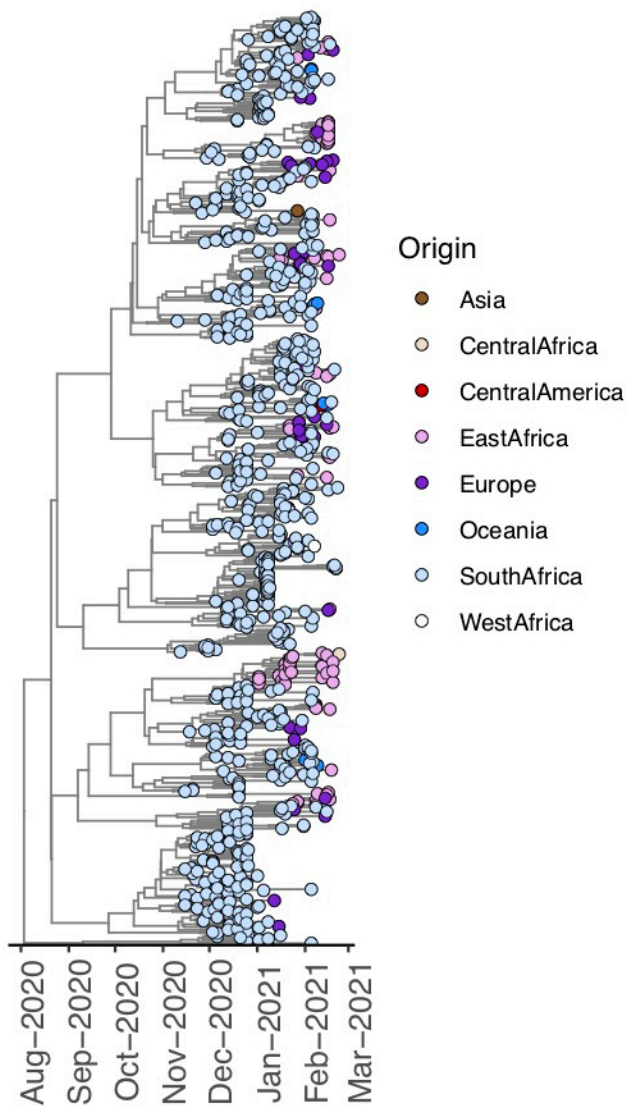

**B**

B.1.525

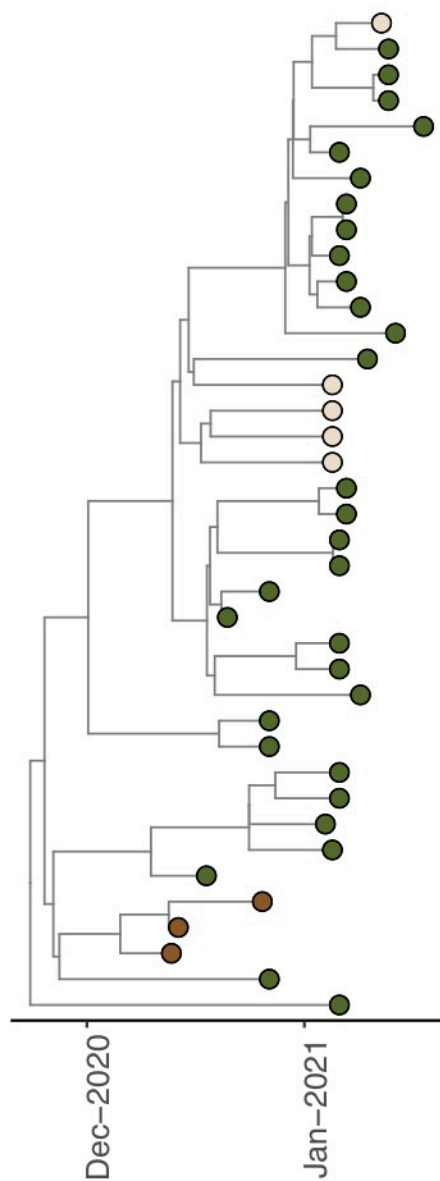

**C**

A.23/A.23.1

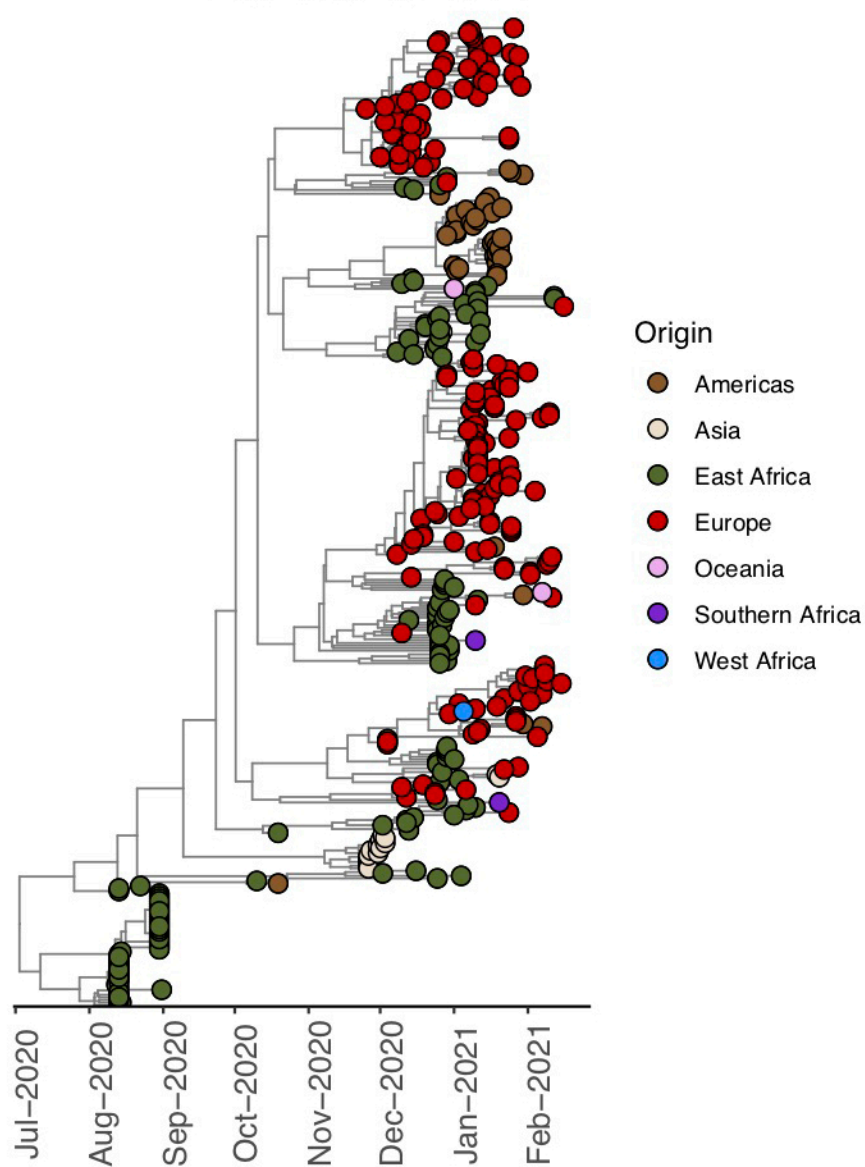

**D**

C.1/C.1.1

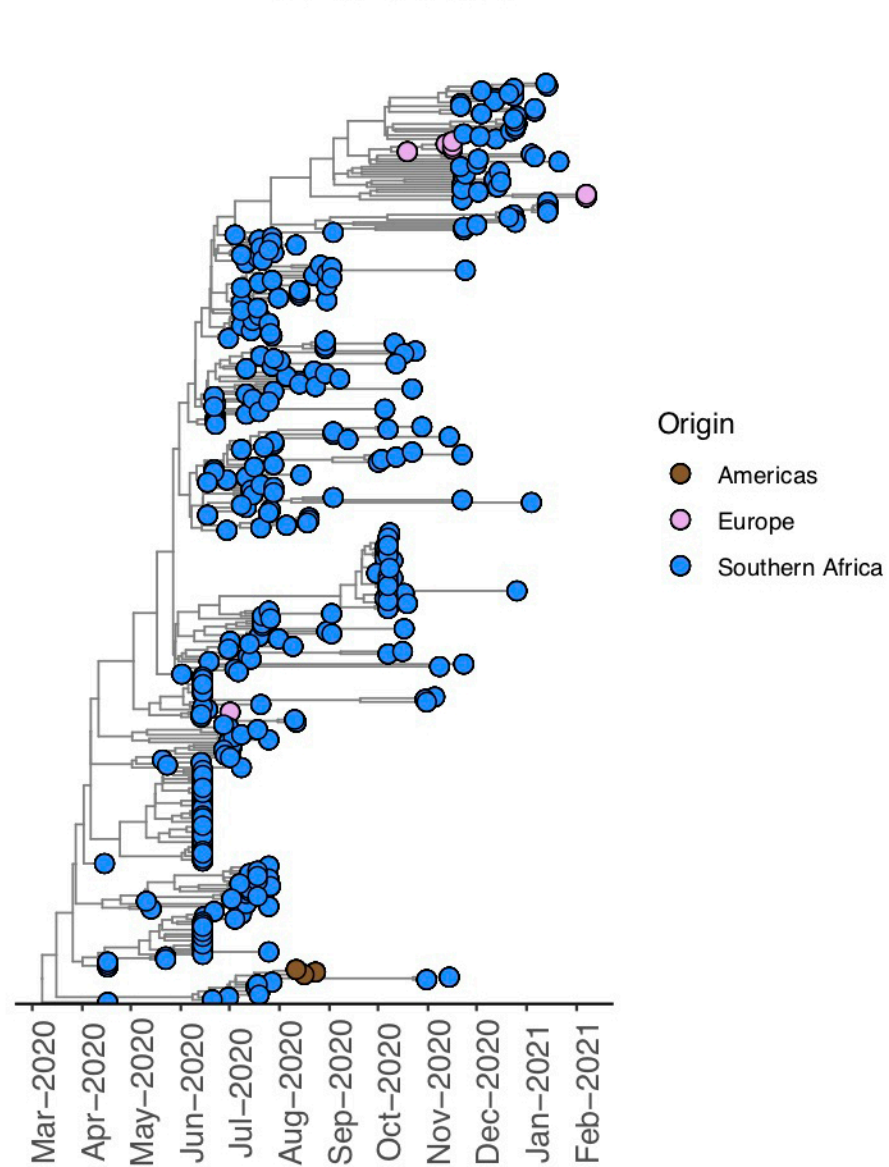

Supplement: Supplementary file [file media-4.pdf]
