# Supplementary material for: A year of genomic surveillance reveals how the SARS-CoV-2 pandemic unfolded in Africa
Source: bioRxiv or medRxiv preprint supplement (doi:10.1101/2021.05.12.21257080), 2021-05-13

# Figure S6

## A

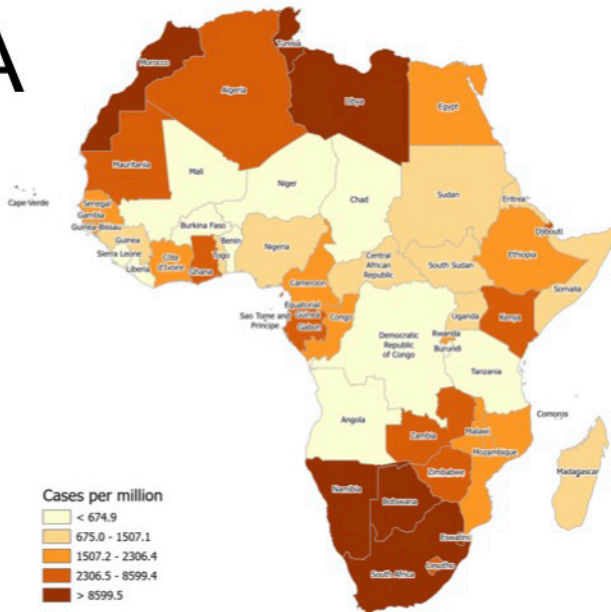

## B

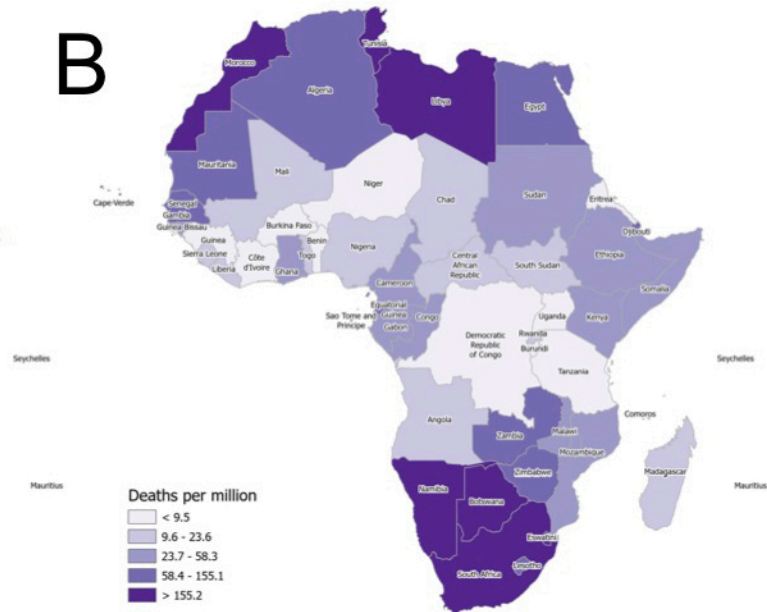

## C

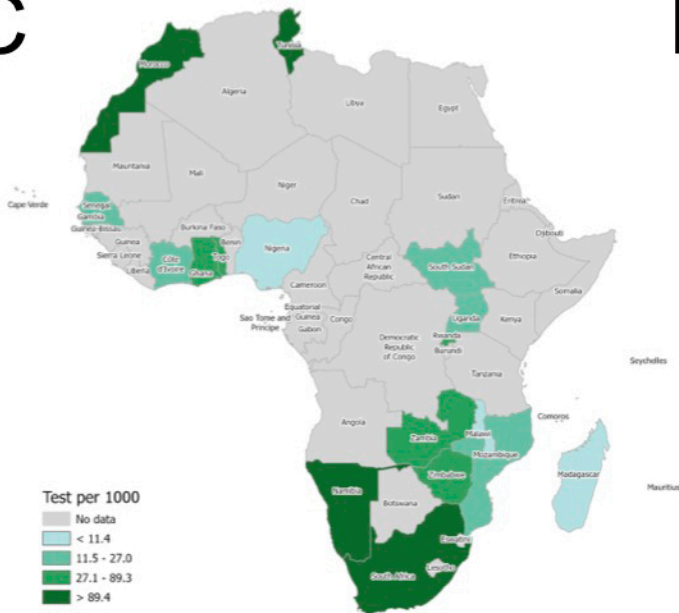

## D

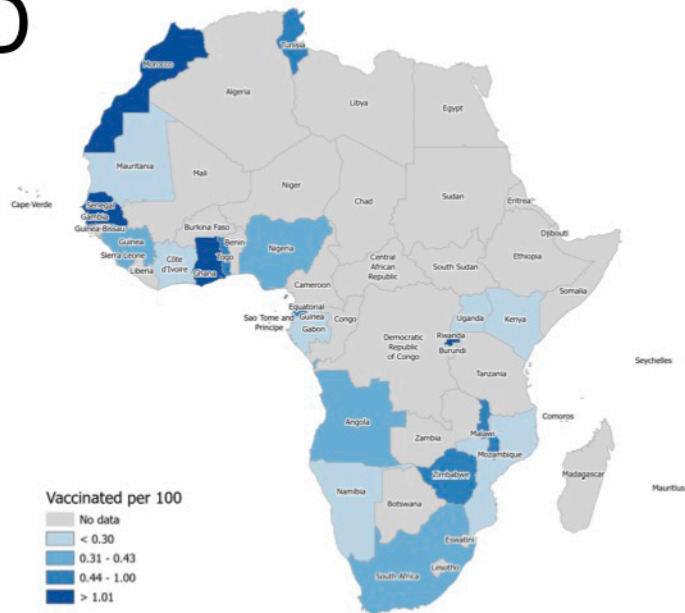

Supplement: Supplementary file [file media-6.pdf]
