# Supplementary material for: A year of genomic surveillance reveals how the SARS-CoV-2 pandemic unfolded in Africa
Source: bioRxiv or medRxiv preprint supplement (doi:10.1101/2021.05.12.21257080), 2021-05-13
Supplement: Supplementary file [file media-8.pdf]

# Figure S8

**A**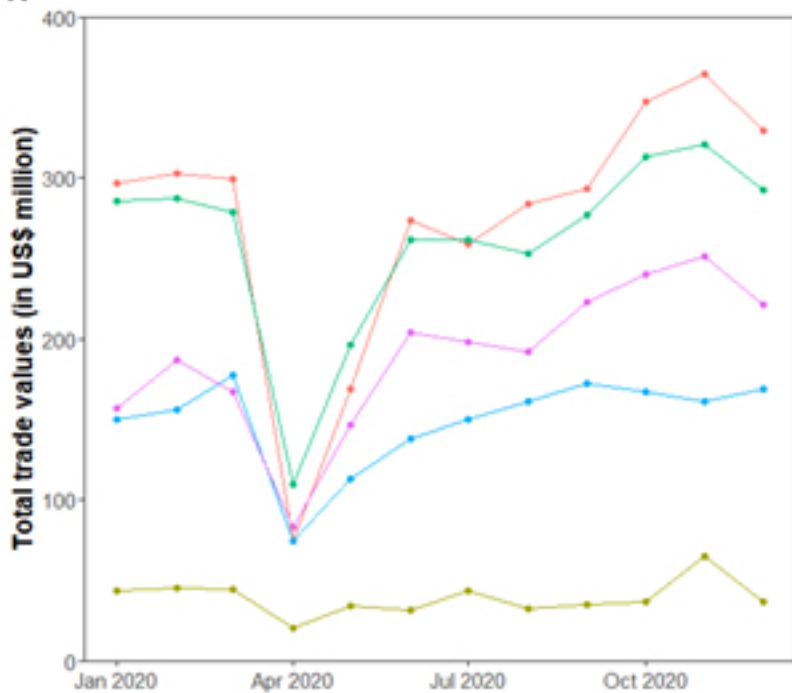**B**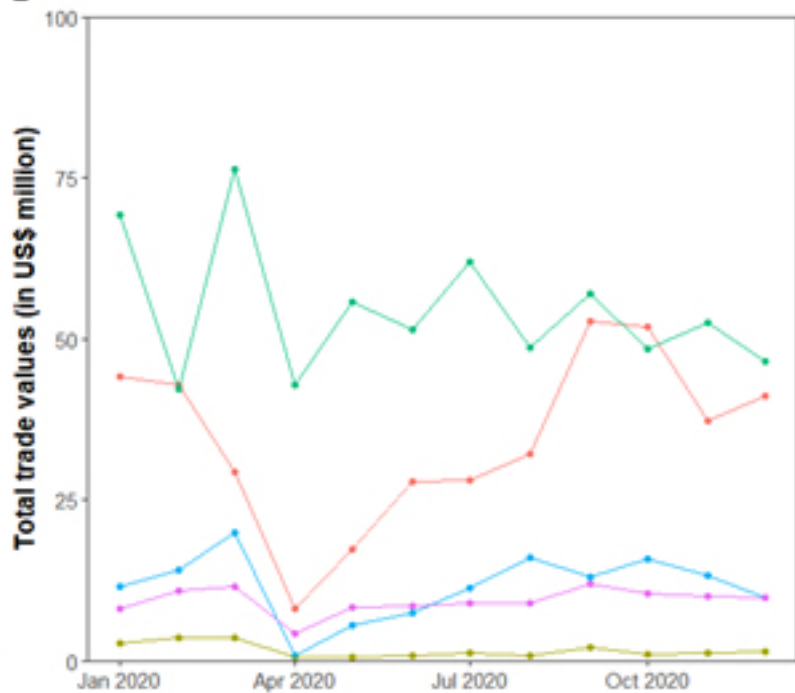

Botswana Kenya Mozambique Zambia Zimbabwe
