# Supplementary material for: A year of genomic surveillance reveals how the SARS-CoV-2 pandemic unfolded in Africa
Source: bioRxiv or medRxiv preprint supplement (doi:10.1101/2021.05.12.21257080), 2021-05-13
Supplement: Supplementary file [file media-9.pdf]

**Supplementary Table S1. Status and restrictions of land border posts in South Africa as of Feb 19, 2021.**

| Country route             | Number of land border posts |            | Restrictions                                                                                                                                                                                                                                                                                                                                                                                                                                                                                                                                                                                                                                               |
|---------------------------|-----------------------------|------------|------------------------------------------------------------------------------------------------------------------------------------------------------------------------------------------------------------------------------------------------------------------------------------------------------------------------------------------------------------------------------------------------------------------------------------------------------------------------------------------------------------------------------------------------------------------------------------------------------------------------------------------------------------|
|                           | Closed (n/N)                | Open (n/N) |                                                                                                                                                                                                                                                                                                                                                                                                                                                                                                                                                                                                                                                            |
| South Africa - Botswana   | 13/17                       | 4/17       | <ul style="list-style-type: none"> <li>· All passengers passing through the border posts are required to present a medical certificate with a negative COVID-19 test result issued within 72 hours or get tested upon arrival and subject to quarantine in a government holding facility. The entry to Zimbabwe requires a negative COVID-19 test result that is within 48 hours.</li> <li>· Rail, ocean, air and road transport is permitted for the movement of cargo to and from other countries, subject to national legislation and any directions.</li> <li>· All borders were closed on Jan 11, 2021 then reopened on February 15, 2021.</li> </ul> |
| South Africa - eSwatini   | 6/11                        | 5/11       |                                                                                                                                                                                                                                                                                                                                                                                                                                                                                                                                                                                                                                                            |
| South Africa - Lesotho    | 7/13                        | 6/13       |                                                                                                                                                                                                                                                                                                                                                                                                                                                                                                                                                                                                                                                            |
| South Africa - Mozambique | 2/4                         | 2/4        |                                                                                                                                                                                                                                                                                                                                                                                                                                                                                                                                                                                                                                                            |
| South Africa - Namibia    | 4/6                         | 2/6        |                                                                                                                                                                                                                                                                                                                                                                                                                                                                                                                                                                                                                                                            |
| South Africa - Zimbabwe   | 0/1                         | 1/1        |                                                                                                                                                                                                                                                                                                                                                                                                                                                                                                                                                                                                                                                            |

**Supplementary Table S2. Variants of Concern/Note (VoC/Ns) in Africa**

| Variant Name   | Lineage | Date Range            | Spike Mutations of Biological Significance (all mutations) | Impact                                                        | Countries                                                                       |
|----------------|---------|-----------------------|------------------------------------------------------------|---------------------------------------------------------------|---------------------------------------------------------------------------------|
| N501Y.V2       | B.1.351 | Oct. 2020 – Feb. 2021 | K417N, E484K, N501Y                                        | Transmissibility, Escape Neutralization, ACE binding Affinity | South Africa, DRC, Mayotte, La Reunion, Zambia, Botswana, Congo, Kenya, Rwanda, |
| A.23, A.23.1   | A.23.1  | Dec. 2020 – Feb 2021  | V367F, Q613H                                               | Infectivity                                                   | Uganda, Rwanda, Ghana, South Africa, Zambia, Botswana                           |
| C.1.1          | C.1.    |                       | S477N                                                      |                                                               | Mozambique,                                                                     |
| B.1.525        | B.1.525 | Dec. 2020 - Feb 2021  | E484K, Q677H, F888L                                        | Escape Neutralization, ACE binding Affinity                   | Nigeria, Ghana, Mayotte, Côte d'Ivoire/Bouaké<br>Algeria                        |
| A.27/N501 Y.V4 | A.27    | Jan 2021 - Feb 2021   | L18F, L452R, N501Y, A653V, H655Y, Q677H, D796Y, G1219V     | under investigation (VUI not VOC)                             | Mayotte, Europe, Ghana, Côte d'Ivoire/Bouaké                                    |
| N501Y.V3       |         |                       |                                                            |                                                               | Brazil                                                                          |
| B.1.160        | B.1.160 |                       | D614G, S477N                                               | confirmed reinfection (under investigation)                   | <b>Tunisia</b> (reinfection), Large European lineage<br>Ghana                   |
| N501Y          | B.1.1.7 | Jan - Mash2021        | D614G, N501Y, del69-70,                                    | Transmissibility                                              | <b>Ghana, Morocco</b><br><b>Algeria</b> , Côte d'Ivoire/Bouaké, DRC             |

**Supplementary Table S3. Sampling or surveillance strategies in various participating institutions.**

| Country      | Proportion of cases sequenced | Sampling strategies                    |                                 |                                                           |                                | Other (details)                                                                                                                                                                                                  |
|--------------|-------------------------------|----------------------------------------|---------------------------------|-----------------------------------------------------------|--------------------------------|------------------------------------------------------------------------------------------------------------------------------------------------------------------------------------------------------------------|
|              |                               | Regular surveillance (random sampling) | Cluster/outbreak investigations | Surveillance of imported cases (linked to border testing) | Investigation of re-infections |                                                                                                                                                                                                                  |
| South Africa | 0.20%                         | Yes                                    | Yes                             | No                                                        | Yes                            | Sequencing of infections in vaccine trials<br>Sequencing for health facility-based and community-based research projects                                                                                         |
| Zambia       | 0.27% (0.42%)                 | Yes                                    | Yes                             | Yes                                                       | Yes                            | Not all investigations are being performed at all times. When cases exceed a particular threshold cluster, random and imported case surveillance reduces or stops. Total cases 8/2/21 = 63,573, 8/3/21 = 82,421. |

|                                    |               |     |     |     |     |                                                                                                                                                                                                                                                             |
|------------------------------------|---------------|-----|-----|-----|-----|-------------------------------------------------------------------------------------------------------------------------------------------------------------------------------------------------------------------------------------------------------------|
| Democratic Republic of Congo (DRC) | 1.4 % (2.87%) | Yes | No  | Yes | No  | Regular surveillance is based on samples availability; the surveillance of imported cases is based on samples of travellers coming in DRC. there are also "sequencing based on a research project focused on respiratory infections (Andemia)               |
| South Africa (FS)                  |               | Yes | No  | No  | No  | All samples with Cts lower that 30 are stored (with storage record). From 5 districts samples are selected randomly on a week basis (10 - 30) per district. From the ~15 000 stored samples no repeat testing has been identified within less than 90 days. |
| Ghana (Uhas)                       | 0.36% (0.12%) | Yes | Yes | No  | No  | Random surveillance based on clusters of cases. During periods of suspected widespread infections, cases are randomly selected and sequenced.                                                                                                               |
| Tunisia                            | 0.04%         | Yes | No  | No  | Yes | Random surveillance. Cases are randomly selected and sequenced. Some suspected reinfection cases are now tested in Sfax (Tunisia).                                                                                                                          |

|                        |        |     |     |     |     |                                                                                                                                                                                                                                                                                                                                                                                                                              |
|------------------------|--------|-----|-----|-----|-----|------------------------------------------------------------------------------------------------------------------------------------------------------------------------------------------------------------------------------------------------------------------------------------------------------------------------------------------------------------------------------------------------------------------------------|
| Morocco                |        | Yes | Yes | Yes | Yes | Sequencing of 10% of Sample that are positif for S drop real time PCR test using (taqPath kit from thermo) . Sanger Sequencing of the entire S gene for the confirmation of mutation related to new varriants. WGS for the genomic surveillance over time et geographical localtion.                                                                                                                                         |
| Equatorial Guinea      | 3.10%  | Yes | YES | Yes | No  | During the first wave from March to August, all positive samples were stored and a random selection of these samples were sequenced.                                                                                                                                                                                                                                                                                         |
| Côte d'Ivoire (Bouaké) | 24.30% | Yes | No  | No  | No  | Data set includes all CoV-2 RT-PCR samples tested positive from surveillance in regions of Côte d'Ivoire other than Abidjan; testing at CHU Bouaké; sampling period May-November 2020. Currently generating sequences from samples collected between Dec 2020 and March 2021. Calculation of cases (collumn C): suspected cases: 1199; of those tested: 100%; of those tested positive: 268 (22.36%); of those sequenced: 65 |

|         |       |     |     |     |    |                                                                                                                                                                                                                                                                             |
|---------|-------|-----|-----|-----|----|-----------------------------------------------------------------------------------------------------------------------------------------------------------------------------------------------------------------------------------------------------------------------------|
| Algeria | 0,08% | Yes | Yes | Yes | No | Sequencing of Sample that are negatif for S by rRTPCR test using (taqPath kit from thermo) .<br>Sanger Sequencing of the entire S gene for the confirmation of mutation related to new varriants.<br>WGS for the genomic surveillance using MinION nanopore is in progress. |
| Mayotte |       | Yes | Yes | No  | No | Random surveillance, with extra samples collections in case of                                                                                                                                                                                                              |
